# Supplementary material
Source: Springer Nature journal article supplement (https://www.springermedizin.de/resource/supplementary/12889_2007_1002_MOESM1_ESM.pdf/9502878)

odds ratio for men v women with 95% CIs

## IHD

## pneumonia

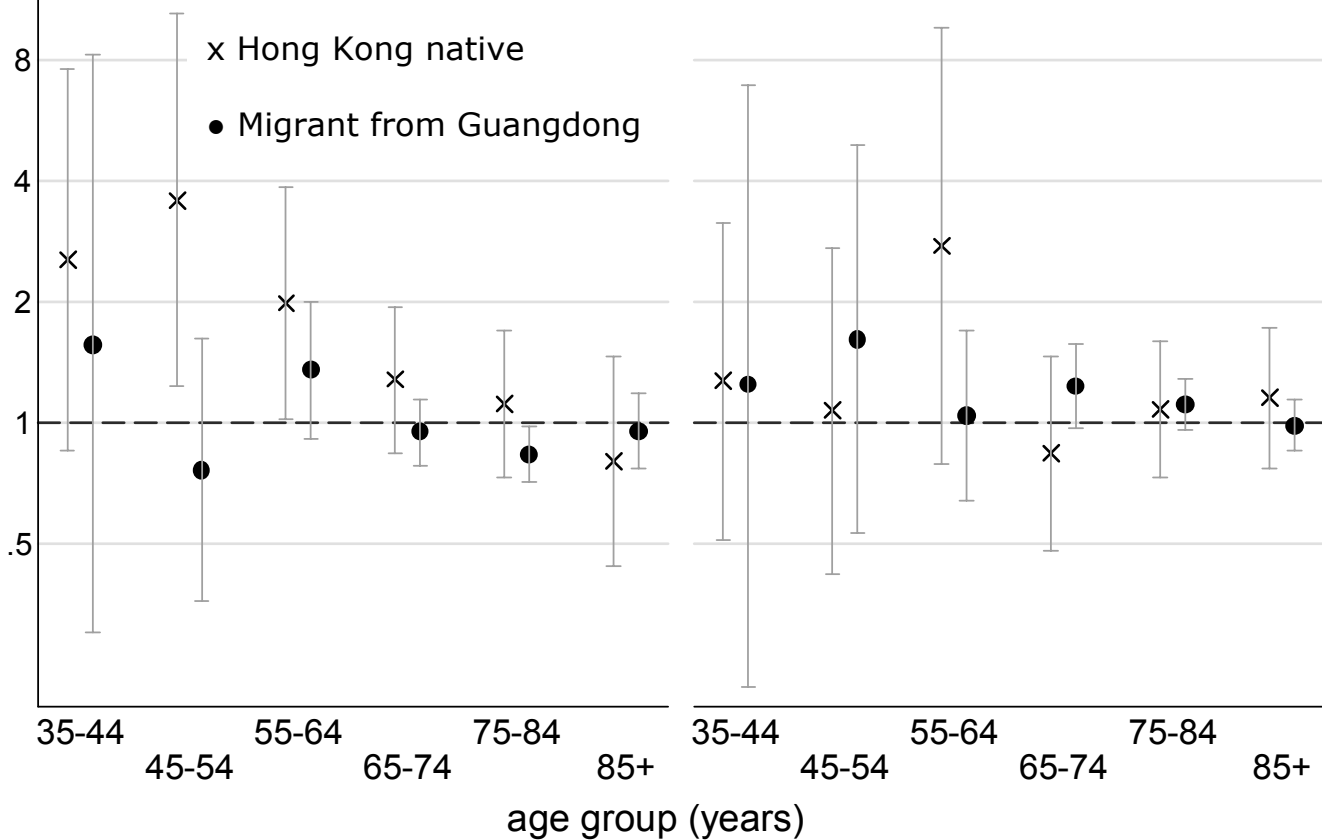

Supplement: MOESM1 [file 9502878]
